# Supplementary material for: A single colorimetric sensor for multiple targets: the sequential detection of Co2+and cyanide and the selective detection of Cu2+in aqueous solution
Source: Royal Society of Chemistry journal article supplement (doi:10.1039/c7ra01580a), 2017-01-01
Supplement: c7ra01580a1.pdf [file c7ra01580a1.pdf]

## Supporting Information

### **A single colorimetric sensor for multiple targets: the sequential detection of $\text{Co}^{2+}$ and cyanide and the selective detection of $\text{Cu}^{2+}$ in aqueous solution**

Hyo Jung Jang, Tae Geun Jo, Cheal Kim\*

*Department of Fine Chemistry and Department of Interdisciplinary Bio IT Materials, Seoul National University of Science and Technology, Seoul 139-743, Korea. Fax: +82-2-973-9149; Tel: +82-2-970-6693; E-mail: [chealkim@seoultech.ac.kr](mailto:chealkim@seoultech.ac.kr)*

**Table S1.** Examples for the simultaneous detection of  $\text{Co}^{2+}$  and  $\text{Cu}^{2+}$  by organic chemosensors.

| Sensor                                                                              | Detection limit ( $\mu\text{M}$ )              | Binding constant                                                            | Water % in solvent | Method of detection | Reference |
|-------------------------------------------------------------------------------------|------------------------------------------------|-----------------------------------------------------------------------------|--------------------|---------------------|-----------|
| 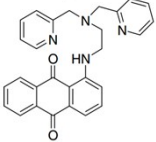   | $\text{Co}^{2+}$ 30<br>$\text{Cu}^{2+}$ 30     | No data                                                                     | 20%                | Naked eye           | [1]       |
|    | $\text{Co}^{2+}$ 0.52<br>$\text{Cu}^{2+}$ 0.41 | No data                                                                     | 100%               | Naked eye           | [2]       |
|    | $\text{Co}^{2+}$ 0.1<br>$\text{Cu}^{2+}$ 0.1   | No data                                                                     | 40%                | Fluorescence        | [3]       |
|  | $\text{Co}^{2+}$ 1.7<br>$\text{Cu}^{2+}$ 2.1   | $\text{Co}^{2+}$ $1.0 \times 10^{10}$<br>$\text{Cu}^{2+}$ $1.0 \times 10^9$ | 100%               | Naked eye           | [4]       |
|  | $\text{Co}^{2+}$ 0.85<br>$\text{Cu}^{2+}$ 0.98 | $\text{Co}^{2+}$ $1.1 \times 10^4$<br>$\text{Cu}^{2+}$ $9.9 \times 10^3$    | 80%                | Naked eye           | [5]       |
|  | $\text{Co}^{2+}$ 0.19<br>$\text{Cu}^{2+}$ 0.13 | $\text{Co}^{2+}$ $1.0 \times 10^{10}$<br>$\text{Cu}^{2+}$ $7.0 \times 10^9$ | 95%                | Naked eye           | this work |

## References

- 1 N. Kaur and S. Kumar, *Tetrahedron Lett.*, 2008, **49**, 5067–5069.
- 2 M. R. Awual, T. Yaita and Y. Okamoto, *Sens. Actuators, B*, 2014, **203**, 71–80.
- 3 J. H. Ye, L. J. Duan and L. L. Jin, *Adv. Mater. Res.*, 2012, **554**, 2045–2048.
- 4 J. J. Lee, Y. W. Choi, G. R. You, S. Y. Lee and C. Kim, *Dalton Trans.*, 2015, **44**, 13305–13314.
- 5 E. J. Song, G. J. Park, J. J. Lee, S. Lee, I. Noh, Y. Kim, S. J. Kim, C. Kim and R. G. Harrison, *Sens. Actuators, B*, 2015, **213**, 268–275.

**Table S2.** Examples for the sequential detection of Co<sup>2+</sup> and CN<sup>-</sup> by organic chemosensors.

| Sensor                                                                              | Detection limit (μM) | Binding constant   | Interference    | Water % in solvent | Method of detection | Reference |
|-------------------------------------------------------------------------------------|----------------------|--------------------|-----------------|--------------------|---------------------|-----------|
| 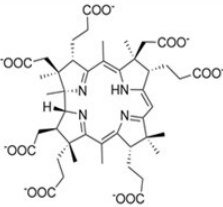   | 10                   | $1.2 \times 10^5$  | No data         | 100%               | Naked eye           | [1]       |
|    | 0.43                 | $1.26 \times 10^7$ | No interference | 25%                | Naked eye           | [2]       |
|   | 10                   | No data            | No data         | 100%               | Naked eye           | [3]       |
|  | 24.11                | $3.0 \times 10^4$  | No interference | 95%                | Naked eye           | this work |

## References

- 1 C. Männel-Croisé and F. Zelder, *Inorg. Chem.*, 2009, **48**, 1272–1274.
- 2 H. Tavallali, G. Deilamy-Rad, A. Parhami and S.Z. Mousavi, *Photochem. Photobiol. B Biol.*, 2013, **125**, 121–130.
- 3 I. Bhowmick, D. J. Boston, R. F. Higgins, C. M. Klug, M. P. Shores and T. Gupta, *Sens. Actuators, B*, 2016, **235**, 325–329.

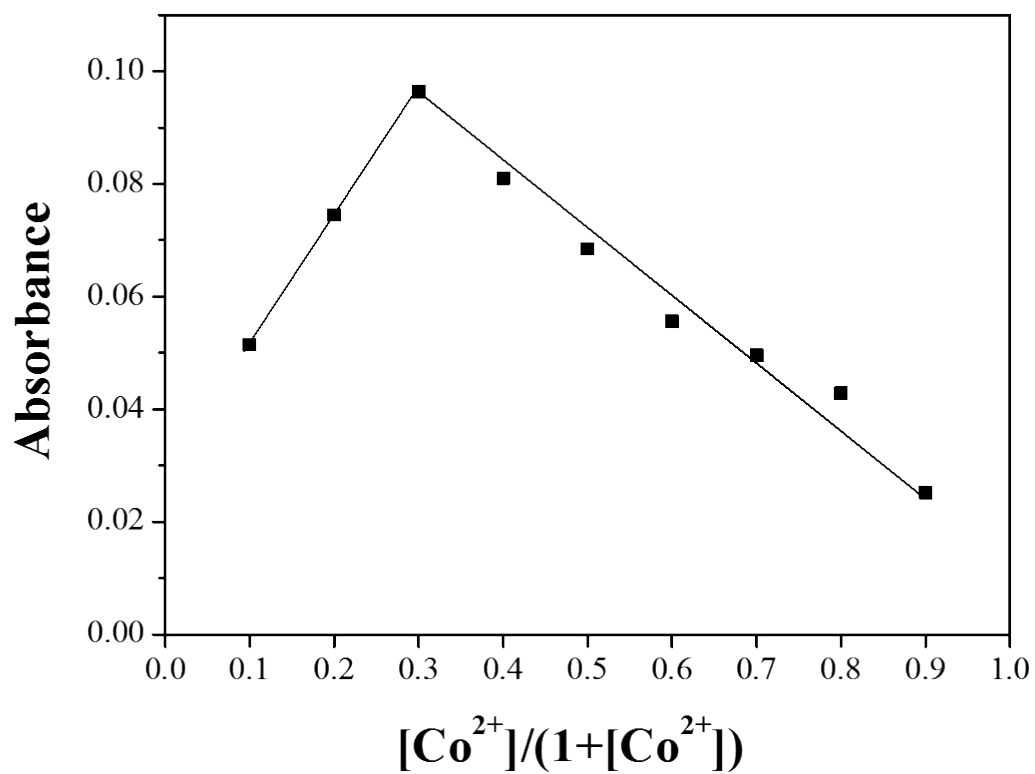

**Fig. S1** Job plot for the binding of **1** with  $\text{Co}^{2+}$ . Absorbance at 400 nm was plotted as a function of the molar ratio of  $[\text{Co}^{2+}]/([\mathbf{1}] + [\text{Co}^{2+}])$ . The total concentration of  $\text{Co}^{2+}$  ions with sensor **1** was  $2.0 \times 10^{-5}$  M.

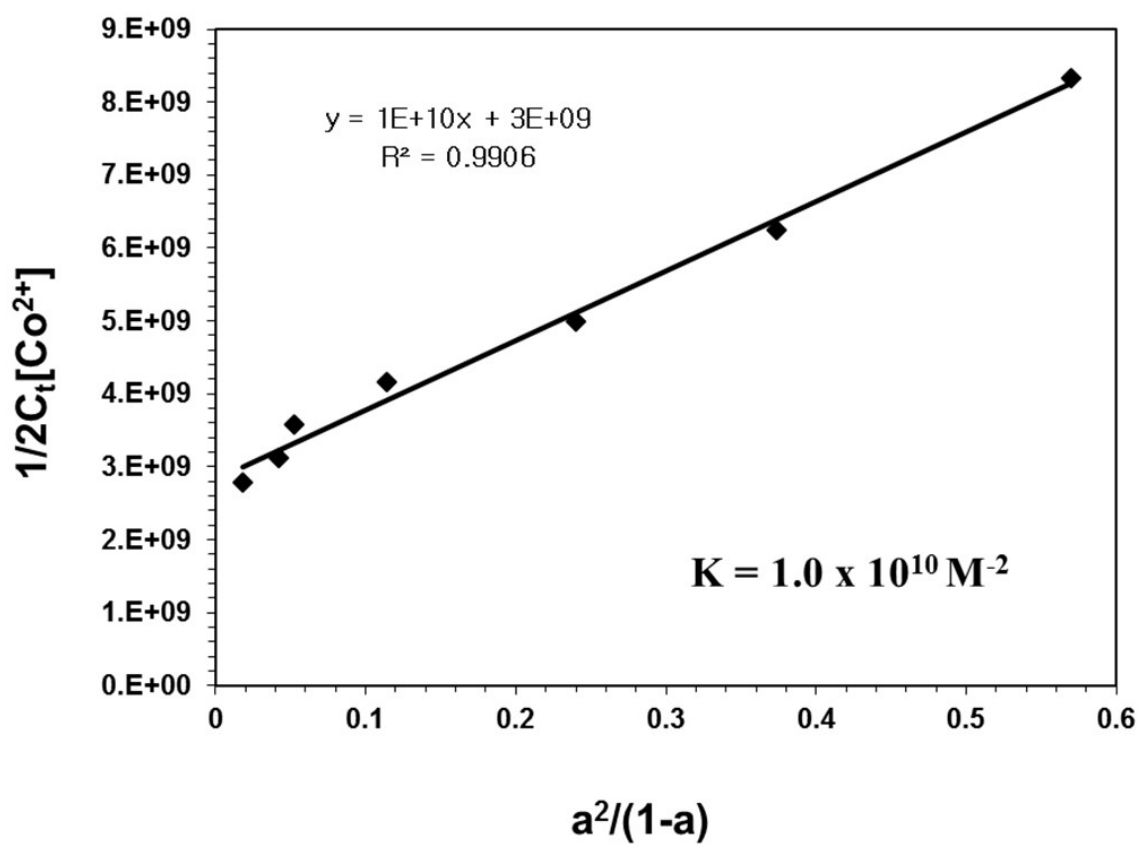

**Fig. S2** Li's equation plot (absorbance at 400 nm) of **1**, assuming 2:1 stoichiometry for association between **1** and  $Co^{2+}$ . 'Ct' means the concentration of **1**, and 'a' does  $[(A_x - A_{max}) / (A_0 - A_{max})]$ .

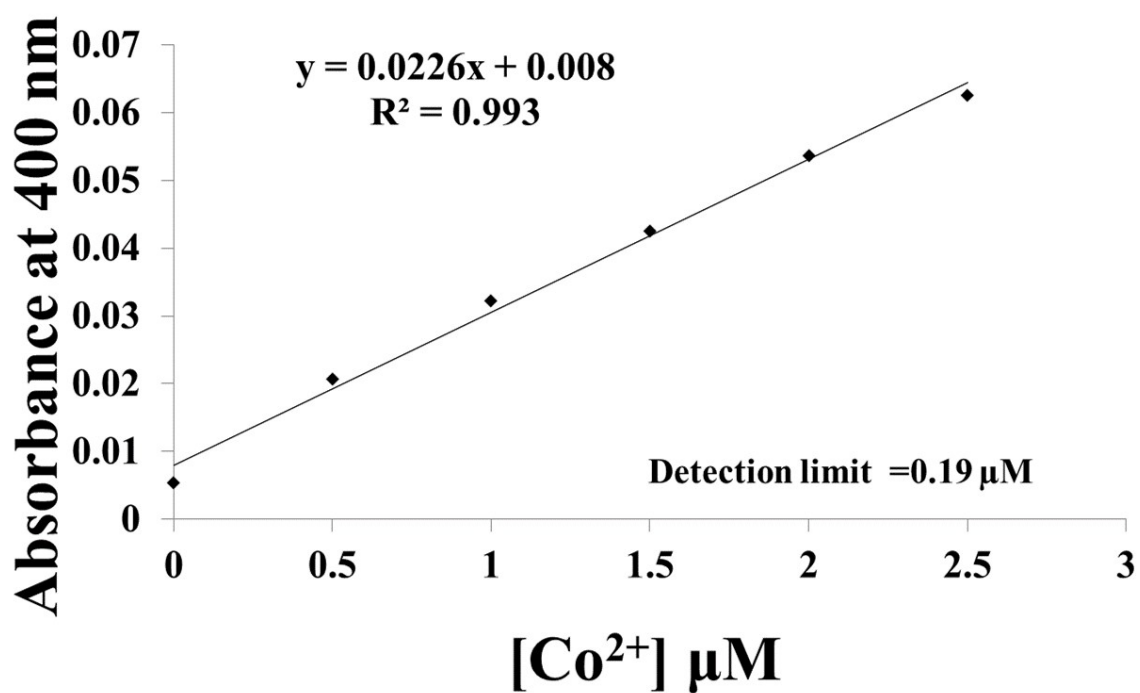

Fig. S3 Detection limit based on change in the ratio (absorbance at 400 nm) of **1** (20 μM) with Co<sup>2+</sup>.

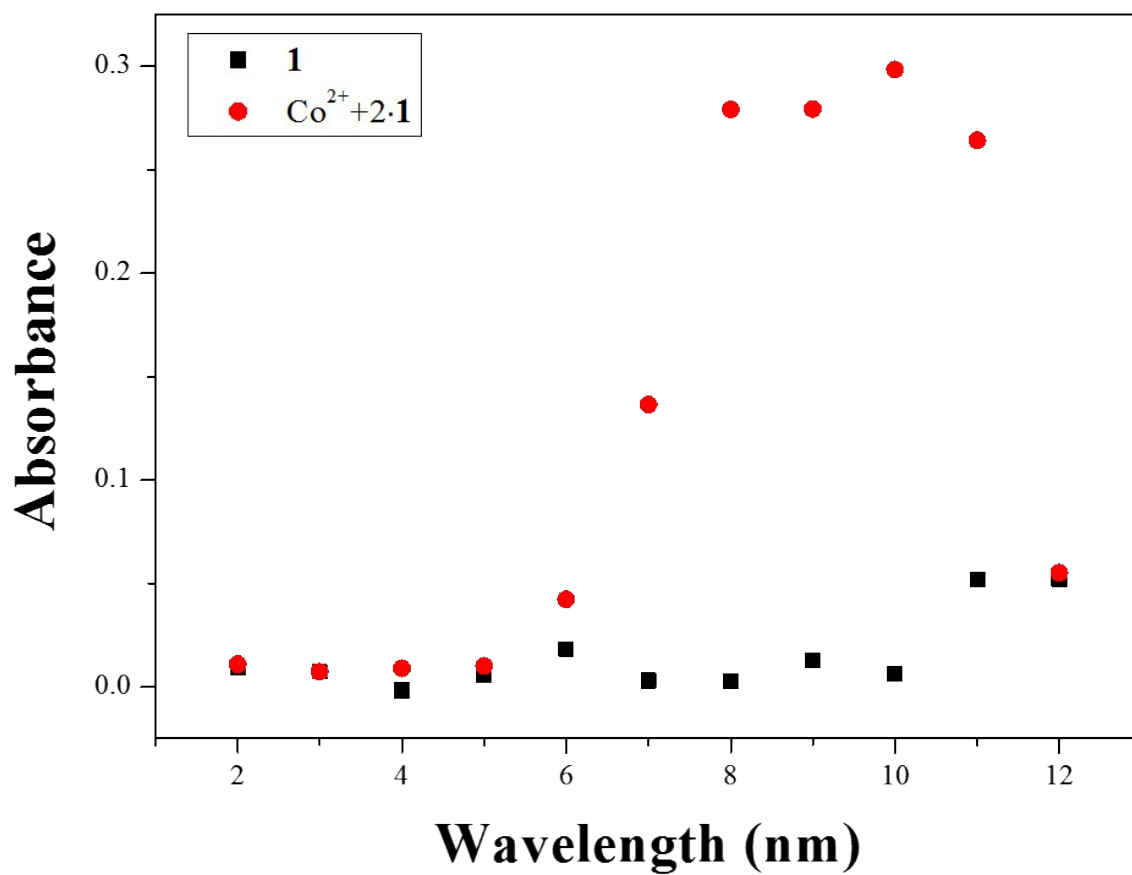

**Fig. S4** UV-vis absorbance (400 nm) of **1** and  $\text{Co}^{2+} \cdot 2 \cdot \mathbf{1}$  complex at different pH (2-12) in a mixture of bis-tris buffer/DMSO (95/5, v/v), respectively.



(a)

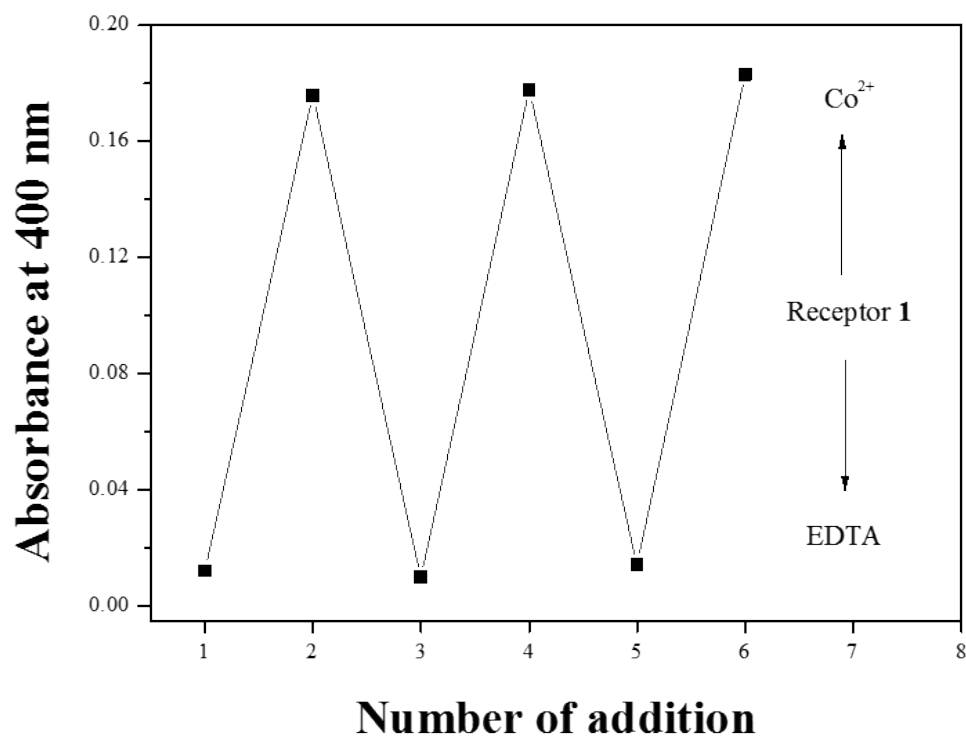

(b)

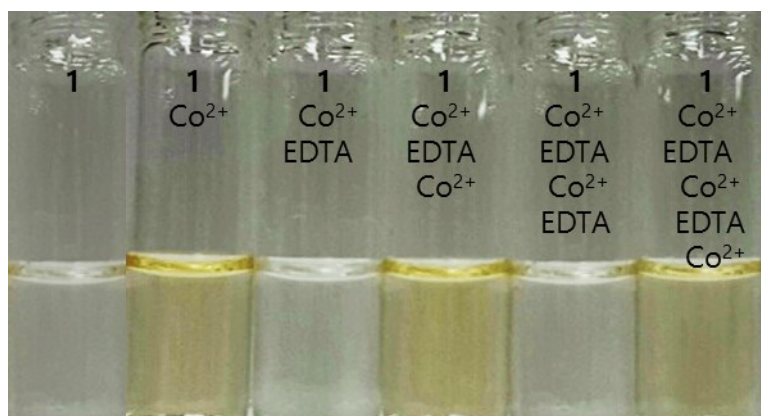

**Fig. S5** (a) UV-vis spectral changes of **1** (20  $\mu\text{M}$ ) after the sequential addition of  $\text{Co}^{2+}$  and EDTA in bis-tris buffer/DMSO (95:5, v/v). (b) The color changes of **1** (20  $\mu\text{M}$ ) after the sequential addition of  $\text{Co}^{2+}$  and EDTA.

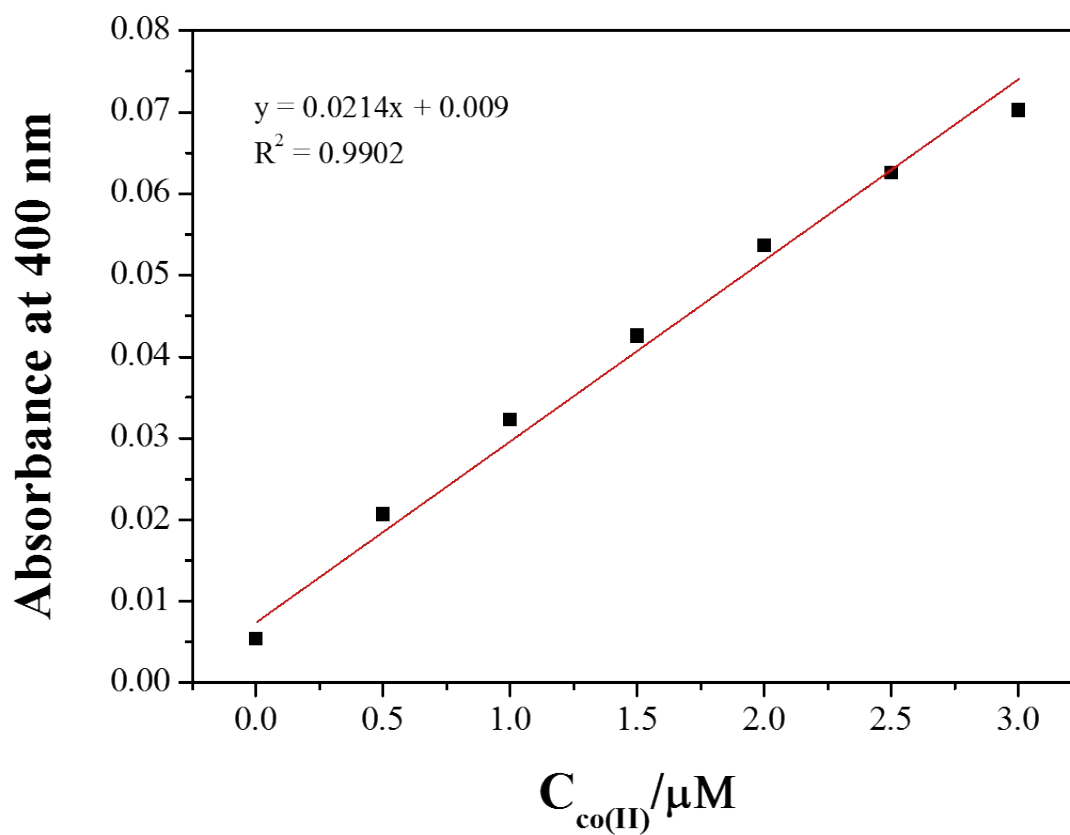

**Fig. S6** Absorbance (at 400 nm) of **1** as a function of Co(II) concentration. [**1**] = 20  $\mu\text{mol/L}$  and [Cu(II)] = 0.00-3.00  $\mu\text{mol/L}$  in a mixture of bis-tris buffer/DMSO (95/5, v/v, 10 mM bis-tris, pH 7.0).

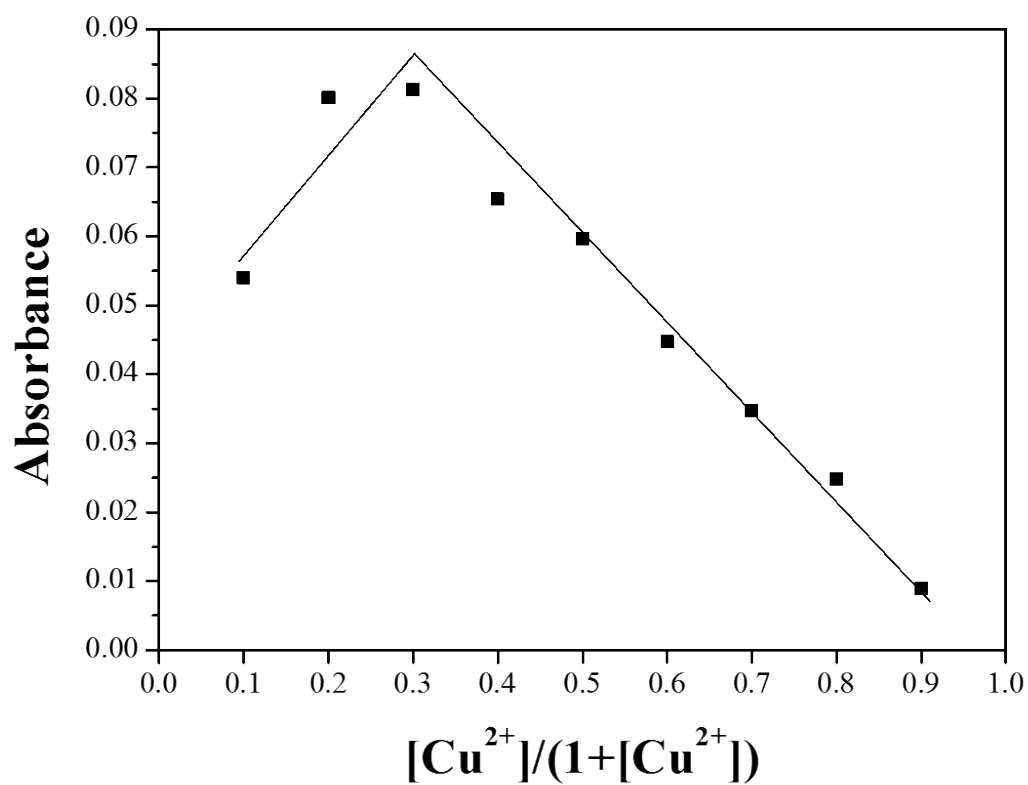

**Fig. S7** Job plot for the binding of **1** with  $Cu^{2+}$ . Absorbance at 400 nm was plotted as a function of the molar ratio of  $[Cu^{2+}]/([1]+[Cu^{2+}])$ . The total concentration of  $Cu^{2+}$  ions with receptor **1** was  $2.0 \times 10^{-5}$  M.

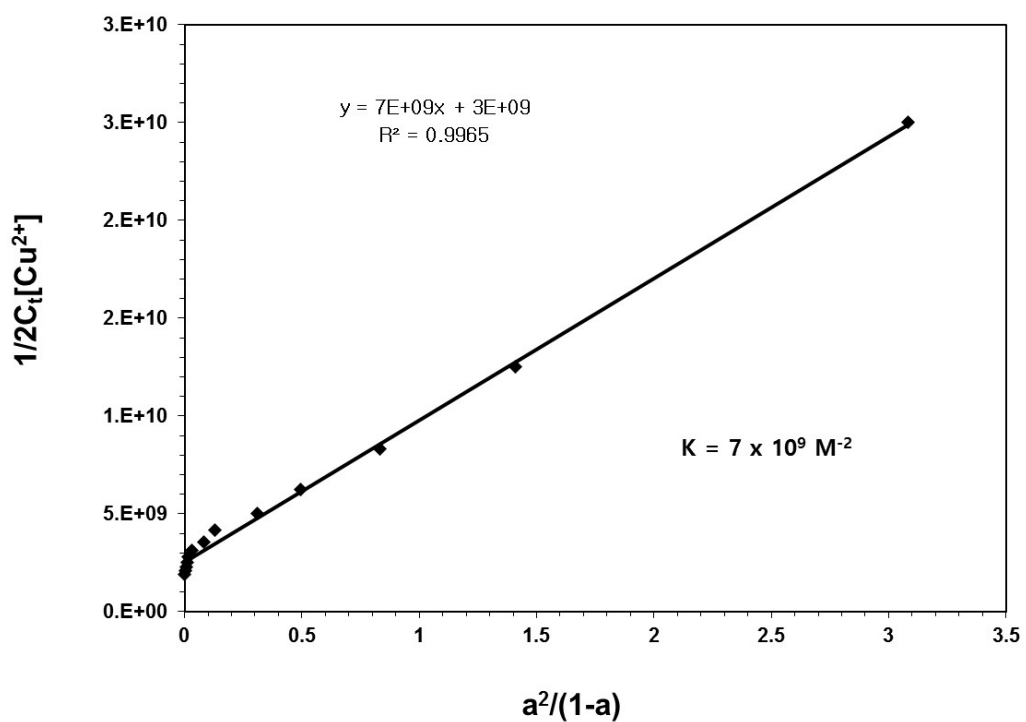

**Fig. S8** Li's equation plot (absorbance at 400 nm) of **1**, assuming 2:1 stoichiometry for association between **1** and  $Cu^{2+}$ . 'Ct' means the concentration of **1**, and 'a' does  $[(A_x - A_{max}) / (A_0 - A_{max})]$ .

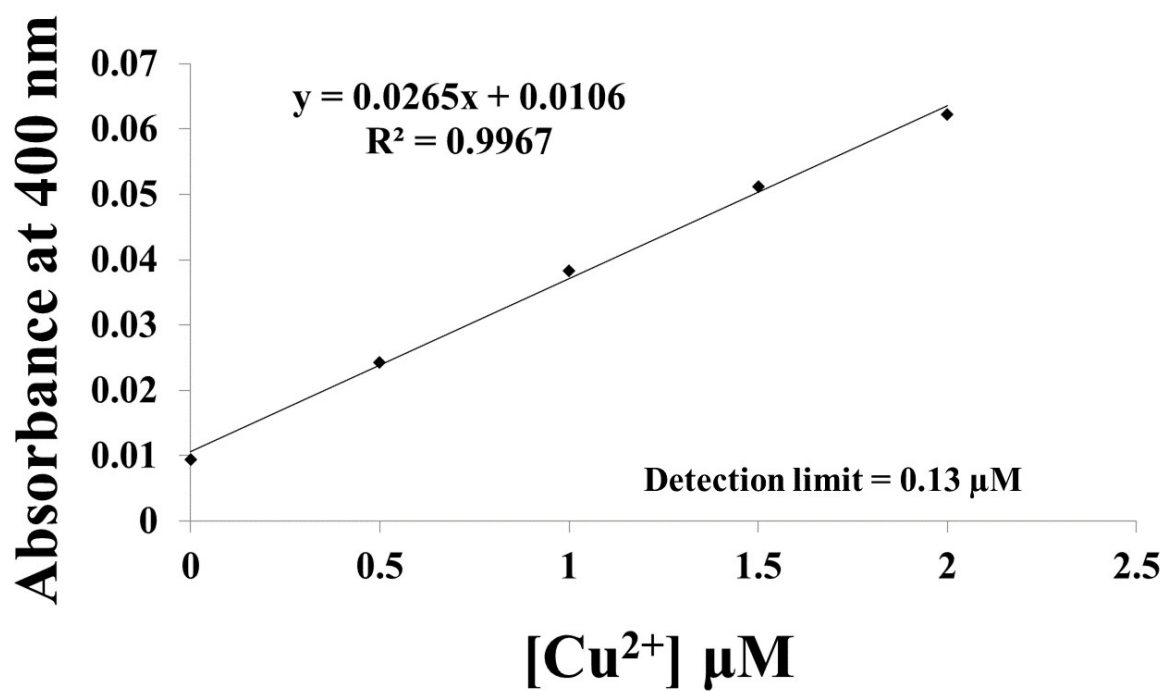

Fig. S9 Detection limit based on change in the ratio (absorbance at 400 nm) of **1** (20 μM) with Cu<sup>2+</sup>.

(a)

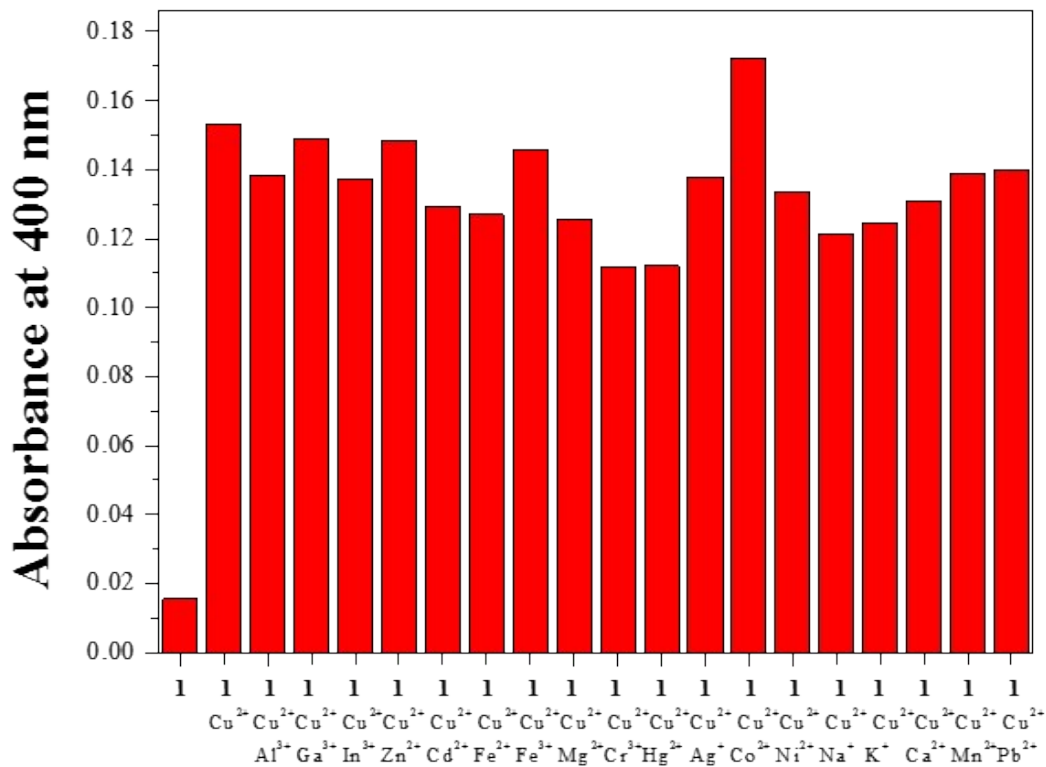

(b)

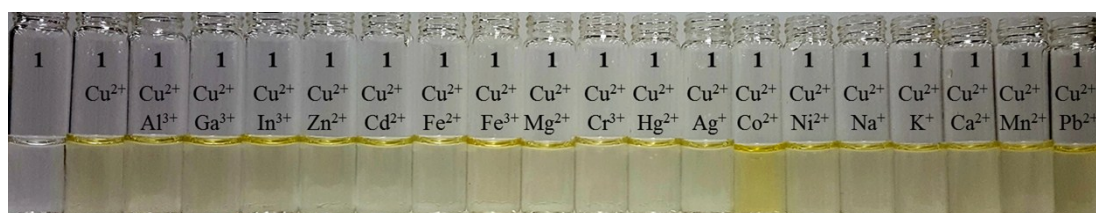

**Fig. S10.** (a) Absorption spectral changes of competitive selectivity of **1** (20  $\mu$ M) toward Cu<sup>2+</sup> (0.7 equiv) in the presence of other metal ions (0.7 equiv) in bis-tris buffer /DMSO (95/5, v/v). (b) The color changes of competitive selectivity of **1** (20  $\mu$ M) toward Cu<sup>2+</sup> (0.7 equiv) in the presence of other metal ions (0.7 equiv).

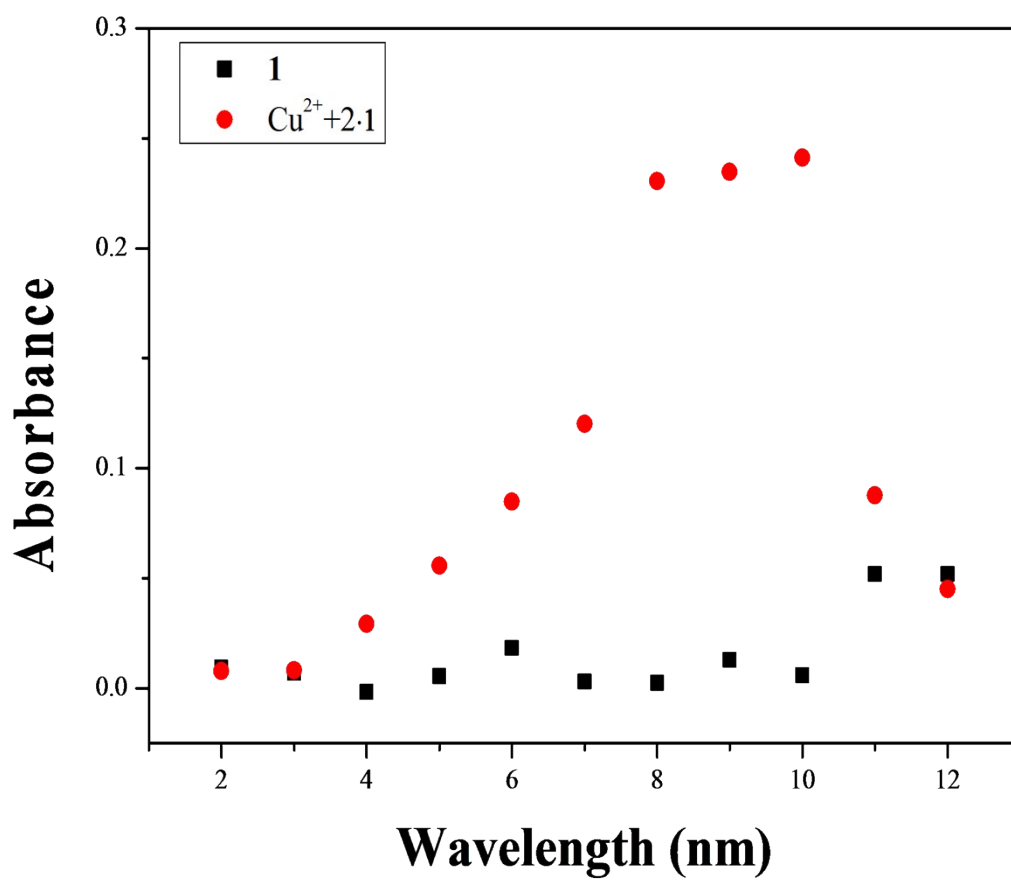

**Fig. S11.** UV-vis absorbance (400 nm) of **1** and Cu<sup>2+</sup>-2·**1** complex at different pH (2-12) in a mixture of bis-tris buffer/DMSO (95/5, v/v), respectively.

(a)

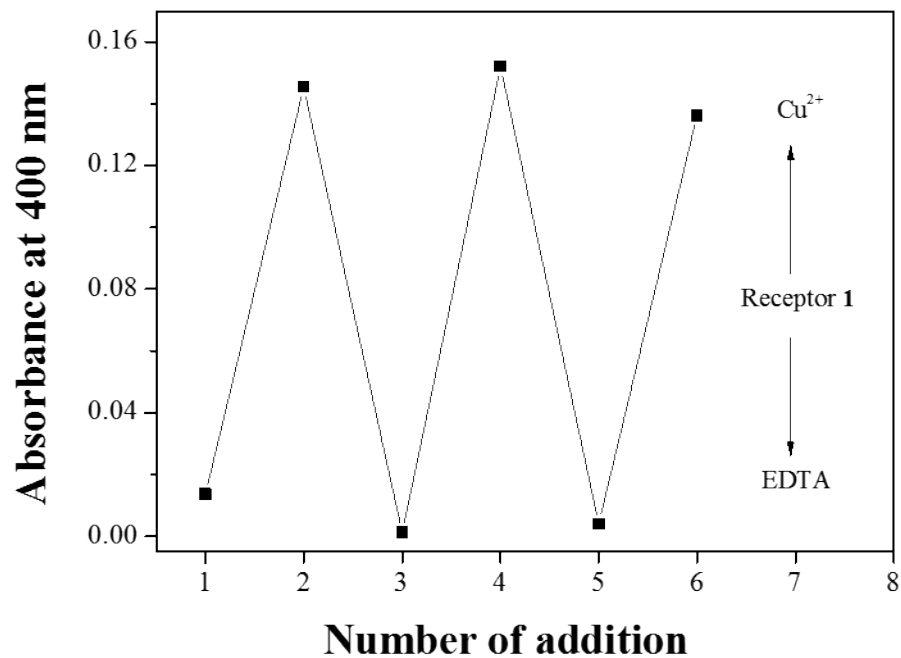

(b)

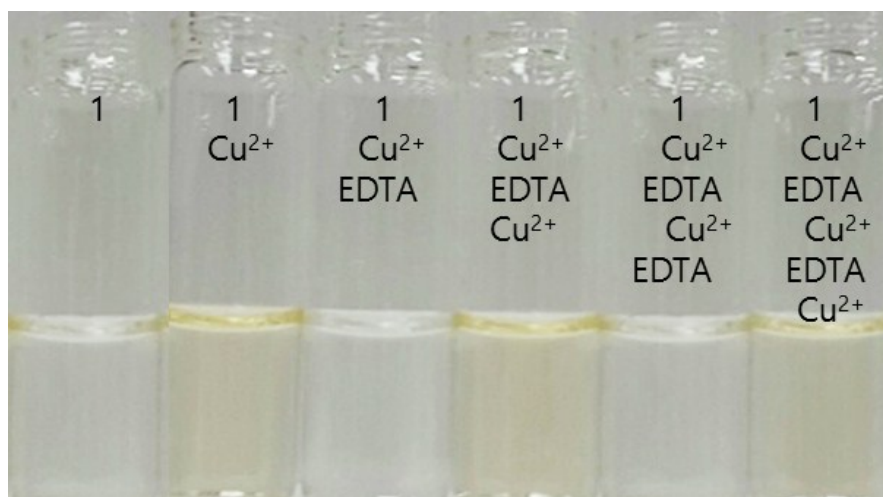

**Fig. S12.** (a) UV-vis spectral changes of **1** (20  $\mu\text{M}$ ) after the sequential addition of  $\text{Cu}^{2+}$  and EDTA in a mixture of bis-tris buffer/DMSO (95/5, v/v). (b) The color changes of **1** (20  $\mu\text{M}$ ) after the sequential addition of  $\text{Cu}^{2+}$  and EDTA.



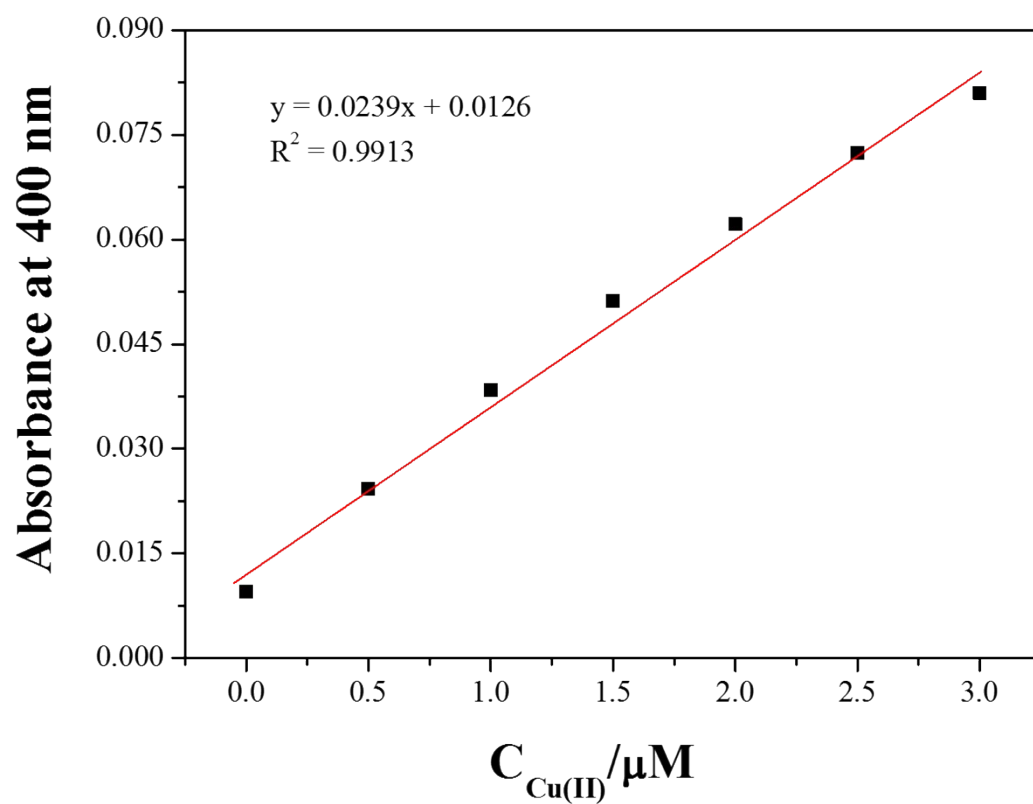

**Fig. S13** Absorbance (at 400 nm) of **1** as a function of Cu(II) concentration. [**1**] = 20  $\mu\text{mol/L}$  and  $[\text{Cu(II)}] = 0.00\text{-}3.00 \mu\text{mol/L}$  in a mixture of bis-tris buffer/DMSO (95/5, v/v, 10 mM bis-tris, pH 7.0).

(a)

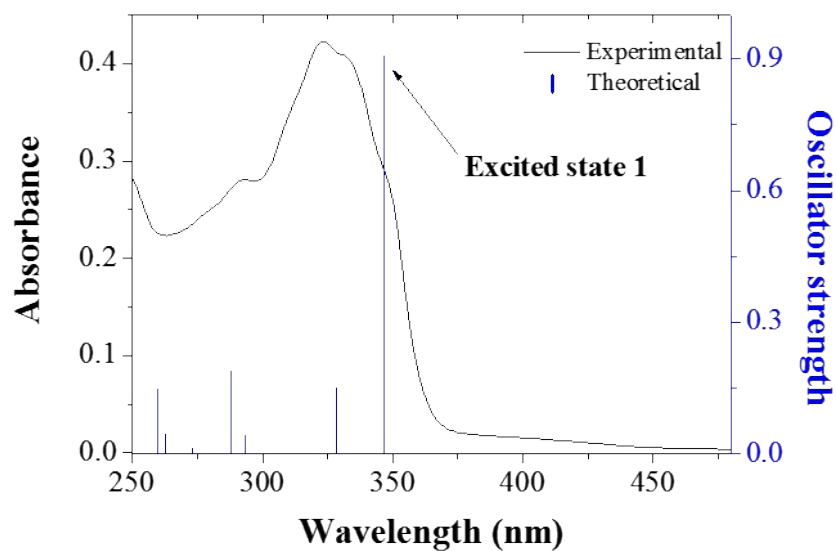

(b)

| Excited State 1 | Wavelength | Percent (%) | Character | Oscillator strength |
|-----------------|------------|-------------|-----------|---------------------|
| H $\square$ L   | 346.8      | 98%         | ICT       | 0.9049              |

(c)

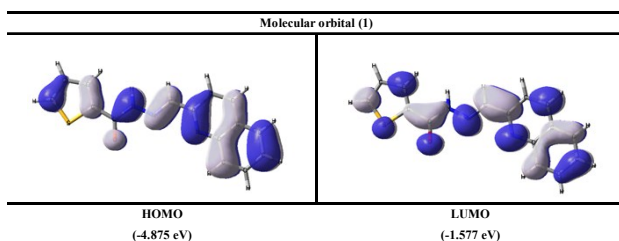

**Fig. S14** (a) The theoretical excitation energies (TD-DFT method) and the experimental UV-vis spectrum of **1**. (b) The major electronic transition energy and molecular orbital contributions for **1** (H = HOMO and L = LUMO). (c) Isosurface (0.030 electron bohr<sup>-3</sup>) of molecular orbitals participating in the major singlet excited state of **1**.

(a)

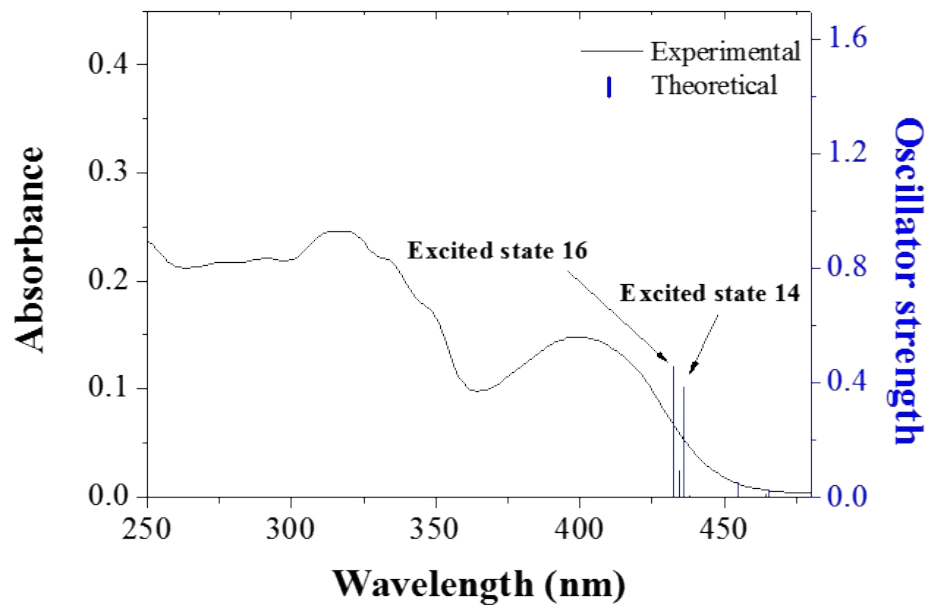

(b)

| Excited State 14                              | Wavelength | percent (%) | Character | Oscillator strength |
|-----------------------------------------------|------------|-------------|-----------|---------------------|
| H-1 ( $\alpha$ ) $\rightarrow$ L ( $\alpha$ ) | 435.75     | 18%         | ICT       | 0.3857              |
| H ( $\alpha$ ) $\rightarrow$ L+1 ( $\alpha$ ) |            | 11%         | ICT       |                     |
| H-3 ( $\beta$ ) $\rightarrow$ L ( $\beta$ )   |            | 19%         | LMCT      |                     |
| H-1 ( $\beta$ ) $\rightarrow$ L+1 ( $\beta$ ) |            | 23%         | ICT       |                     |

  

| Excited State 16                                | Wavelength | percent (%) | Character | Oscillator strength |
|-------------------------------------------------|------------|-------------|-----------|---------------------|
| H-1 ( $\alpha$ ) $\rightarrow$ L+1 ( $\alpha$ ) | 432.57     | 22%         | ICT       | 0.4597              |
| H-4 ( $\beta$ ) $\rightarrow$ L ( $\beta$ )     |            | 22%         | LMCT      |                     |
| H-1 ( $\beta$ ) $\rightarrow$ L+2 ( $\beta$ )   |            | 21%         | ICT       |                     |
| H ( $\beta$ ) $\rightarrow$ L+1 ( $\beta$ )     |            | 10%         | ICT       |                     |

(c)

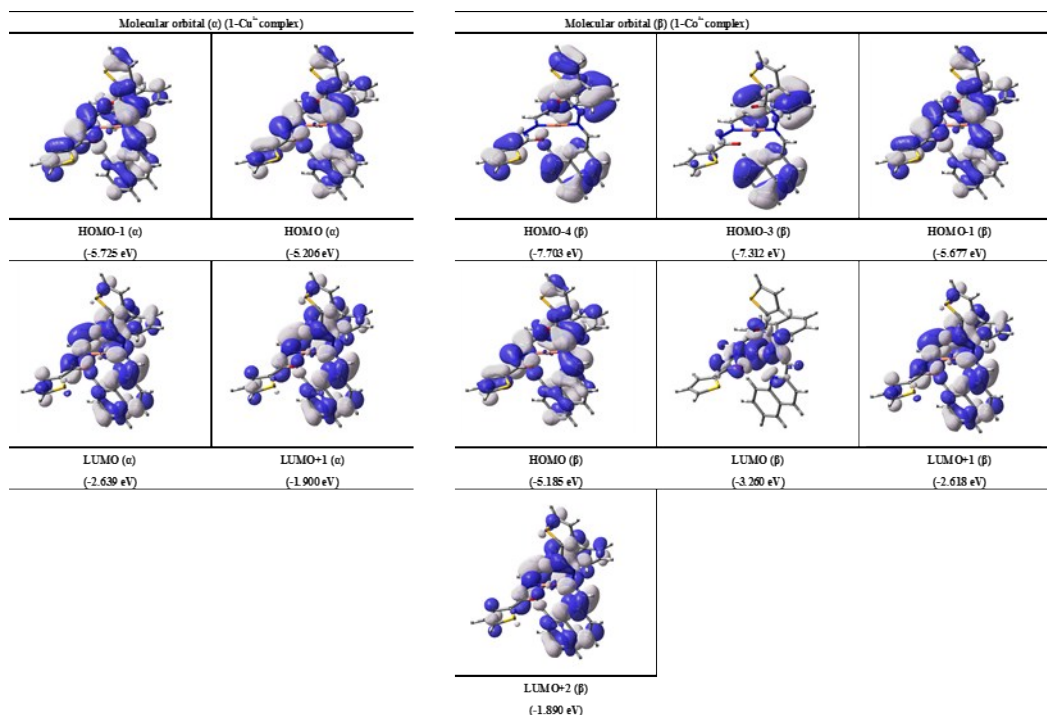

**Fig. S15** (a) The theoretical excitation energies (TD-DFT method) and the experimental UV-vis spectrum of Cu<sup>2+</sup>-2·**1** complex. (b) The major electronic transition energies and molecular orbital contributions for **1** (H = HOMO and L = LUMO). (c) Isosurface (0.030 electron bohr<sup>-3</sup>) of molecular orbitals participating in the major singlet excited state of Cu<sup>2+</sup>-2·**1** complex.

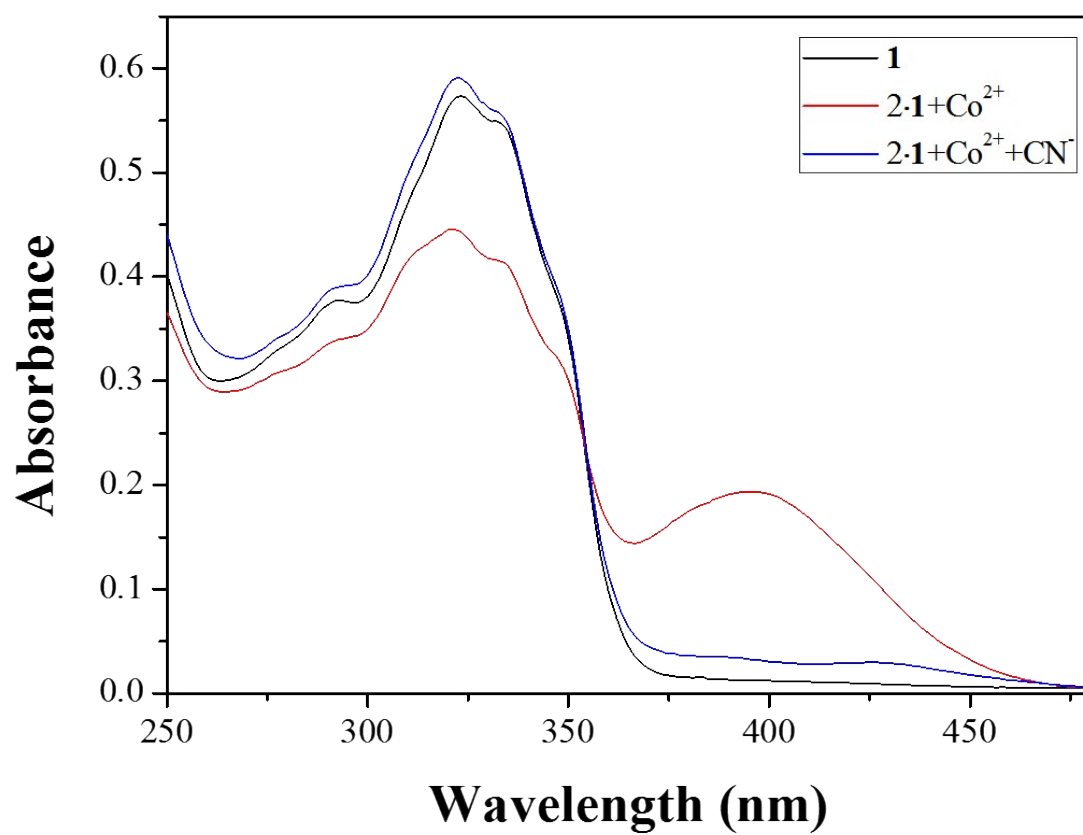

**Fig. S16** UV-vis spectra of **1** (20  $\mu\text{M}$ ),  $\text{Co}^{2+}$ -**2·1** ( $\text{Co}^{2+}$  = 15  $\mu\text{M}$ ), and  $\text{Co}^{2+}$ -**2·1** +  $\text{CN}^-$  (30 equiv) in bis-tris buffer/DMSO (95/5, v/v).

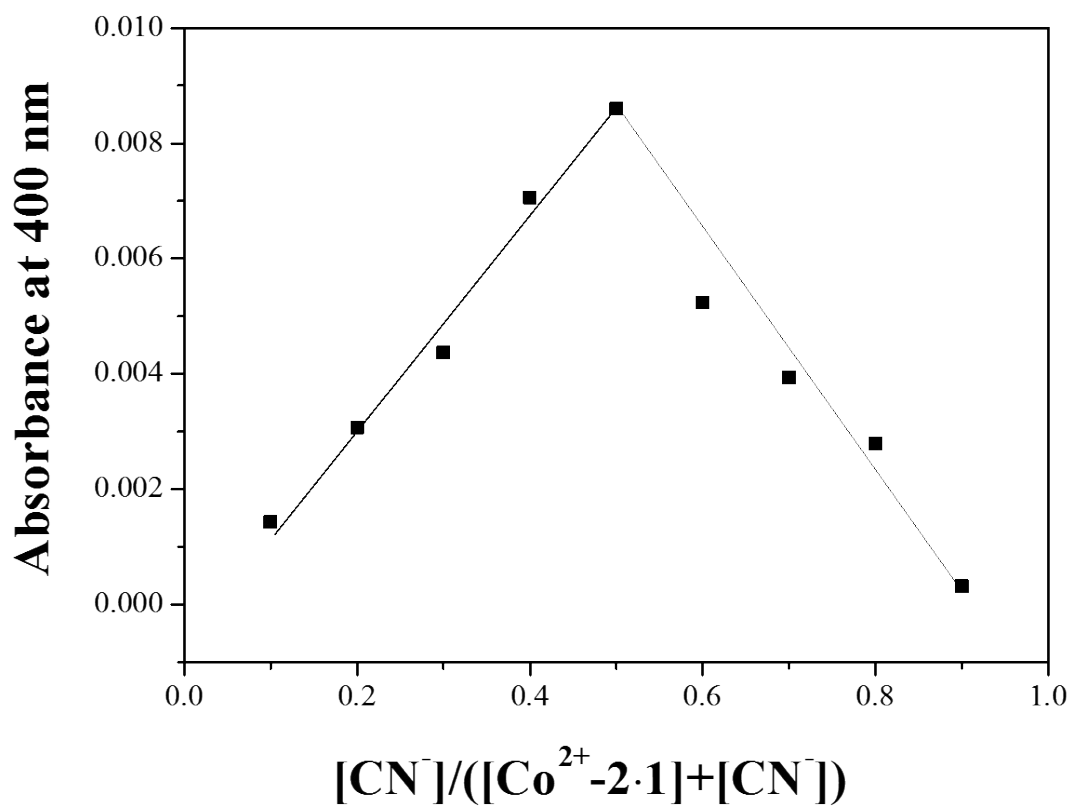

**Fig. S17** Job plot of  $\text{Co}^{2+}\text{-}2\cdot\mathbf{1}$  complex and  $\text{CN}^-$ , where the intensity at 400 nm was plotted against the mole fraction of  $\text{CN}^-$ . The total concentrations of  $\text{CN}^-$  with  $\text{Co}^{2+}\text{-}2\cdot\mathbf{1}$  complex were  $20\ \mu\text{M}$

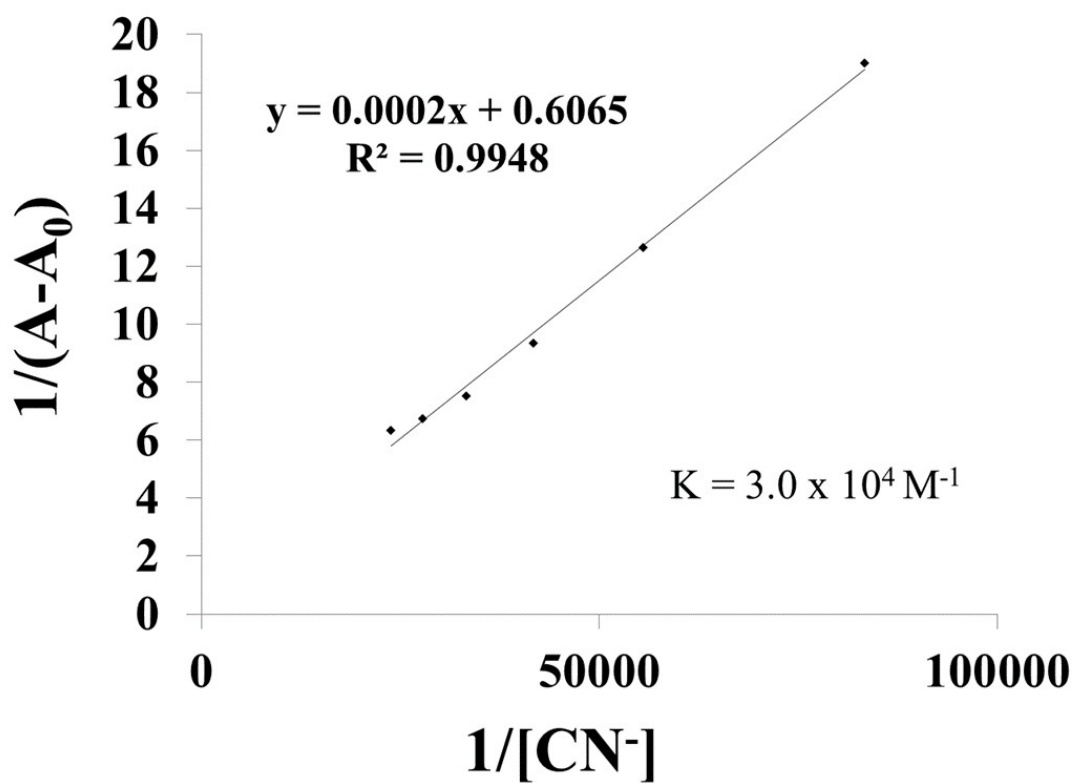

**Fig. S18** Benesi-Hildebrand plot (at 400 nm) of  $\text{Co}^{2+}$ -**2·1** (20  $\mu\text{M}$ ), assuming 1:1 stoichiometry for association between  $\text{Co}^{2+}$ -**2·1** and  $\text{CN}^-$ .

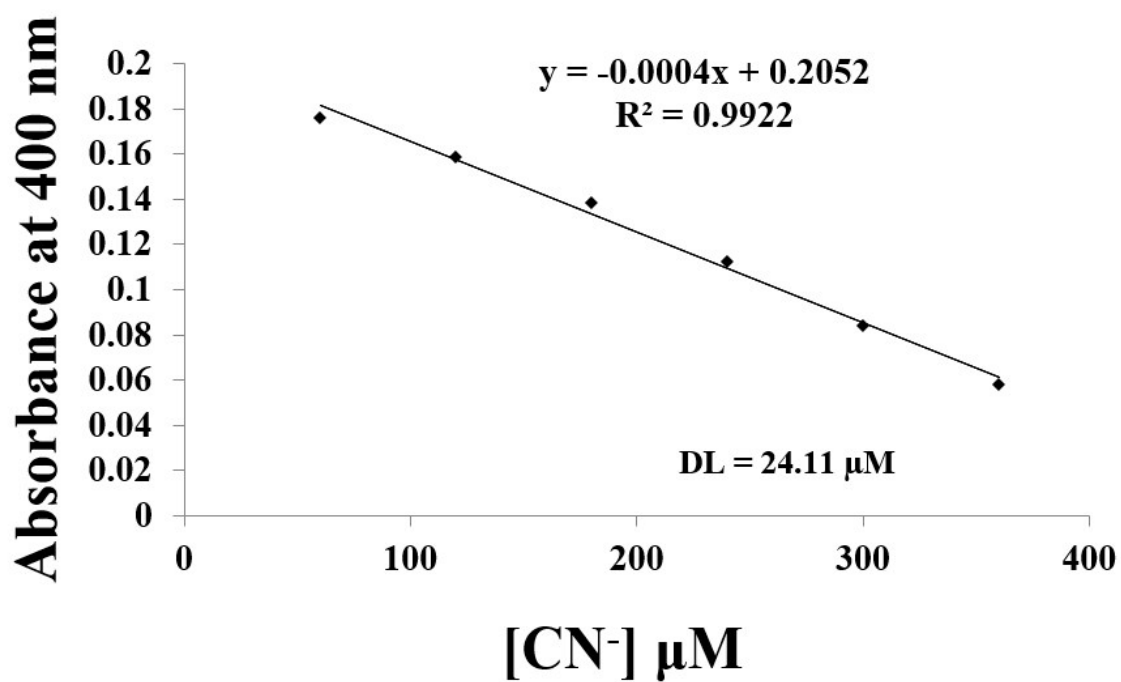

**Fig. S19** Determination of the detection limit based on change in the ratio (absorbance at 400 nm) of  $\text{Co}^{2+}$ -2·1 (20  $\mu\text{M}$ ) with  $\text{CN}^-$ .



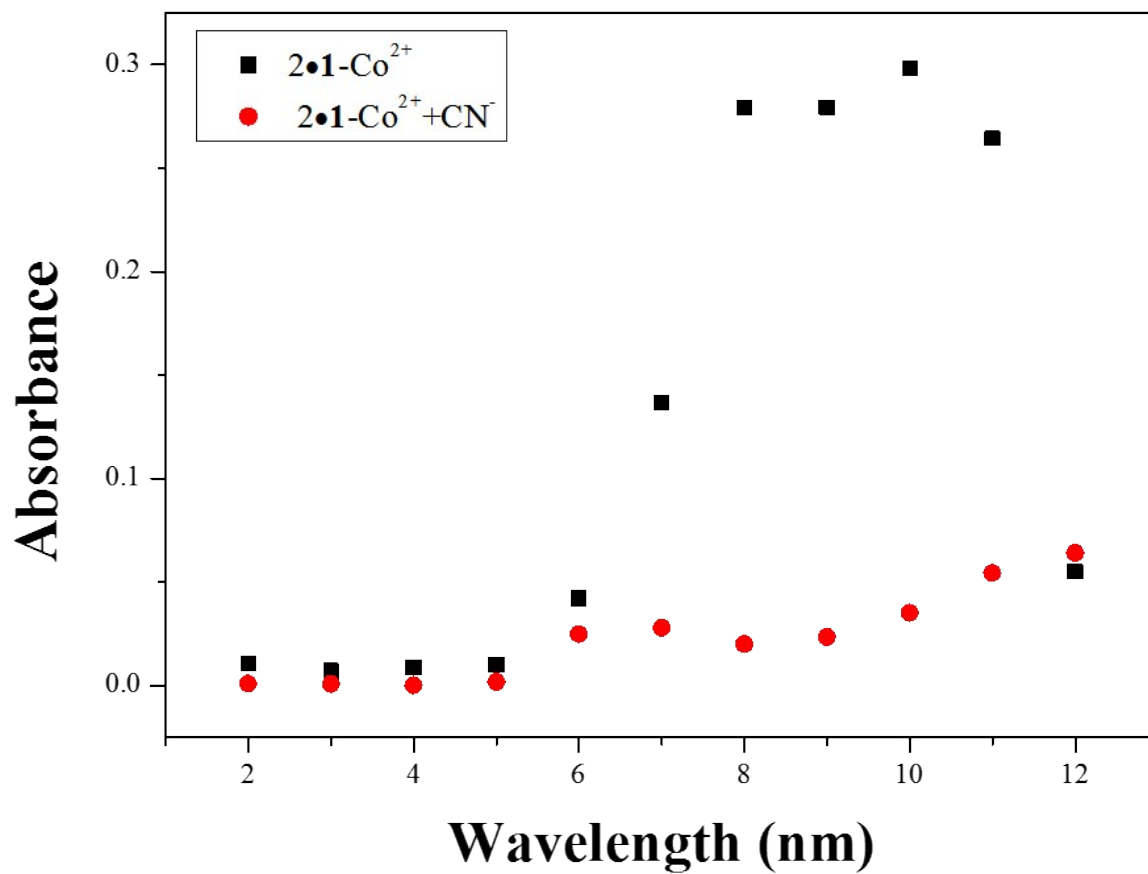

**Fig. S20** UV absorbance (at 400 nm) of  $\text{Co}^{2+}\text{-}2\bullet 1$  (20  $\mu\text{M}$ ) and  $\text{Co}^{2+}\text{-}2\bullet 1\text{-CN}^-$  at different pH (2-12) in a mixture of bis-tris buffer /DMSO (95/5, v/v), respectively.
